# Supplementary material for: Membrane stretch as the mechanism of activation of PIEZO1 ion channels in chondrocytes
Source: PubMed Central journal article supplement — Proc Natl Acad Sci U S A. 2023 Jul 17;120(30):e2221958120. doi: 10.1073/pnas.2221958120 (PMC10372640; doi:10.1073/pnas.2221958120), 2023-07-17
Supplement: pnas.2221958120.sapp.pdf [file pnas.2221958120.sapp.pdf]

1 **Supplementary Figure 1. NTC and P2-siRNA chondrocyte intracellular Ca<sup>2+</sup> response to**  
 2 **100 and 300 nN force. A)** mRNA levels of *PIEZO2* (P2) normalized to ACTB expression level  
 3 in non-targeting control (NTC) and P2-siRNA chondrocytes, in a separate group of pigs from  
 4 those in the 500 nN experiments in Figure 1. AFM loading response of P2-siRNA cells  
 5 compared to their respective NTCs showing representative cells signaling trend, normalized  
 6 intracellular Ca<sup>2+</sup> fluorescence intensity  $\Delta F_{max}/F$ , the percentage of the responding cells, and  
 7 deformation after loading cells to **B)** 100 nN, and **C)** 300 nN. Data presented as mean  $\pm$  SEM.  
 8 For A, n=5 samples; for B and C, percentage of responders, n=4-6 test batches, for applied  
 9 deformation and Ca<sup>2+</sup> response to AFM mechanical loading, n=49-96 cells; for group comparison  
 10 A, B, C, t-test, \* p<0.05, \*\* p<0.005, \*\*\*\* p<0.0001.

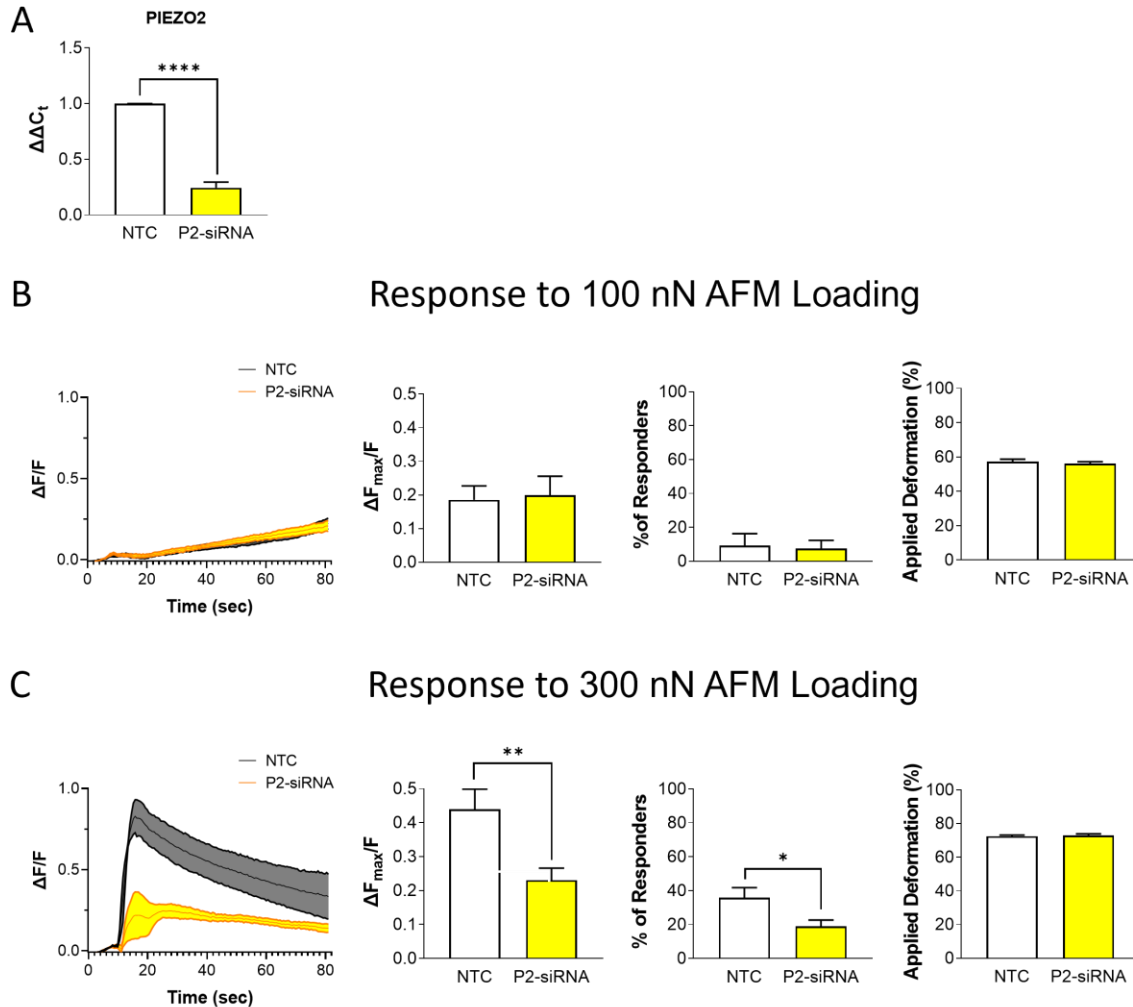

11  
 12  
 13  
 14  
 15  
 16  
 17

18 **Supplementary Video 1. NTC (for P1-siRNA) chondrocytes intracellular Ca<sup>2+</sup> response to**  
19 **500 nN of AFM loading.** Response of chondrocytes treated with NTC for P1-siRNA to 500 nN  
20 of mechanical compression. Green fluorescence indicates an increase in the Ca<sup>2+</sup> concentration in  
21 the cell.

22 **Supplementary Video 2. P1-siRNA chondrocytes intracellular Ca<sup>2+</sup> response to 500 nN of**  
23 **AFM loading.** Response of chondrocytes treated with P1-siRNA to 500 nN of mechanical  
24 compression. Green fluorescence indicates an increase in the Ca<sup>2+</sup> concentration in the cell.

25 **Supplementary Video 3. NTC (for P2-siRNA) chondrocytes intracellular Ca<sup>2+</sup> response to**  
26 **500 nN of AFM loading.** Response of chondrocytes treated with NTC for P2-siRNA to 500 nN  
27 of mechanical compression. Green fluorescence indicates an increase in the Ca<sup>2+</sup> concentration in  
28 the cell.

29 **Supplementary Video 4. P2-siRNA chondrocytes intracellular Ca<sup>2+</sup> response to 500 nN of**  
30 **AFM loading.** Response of chondrocytes treated with P2-siRNA to 500 nN of mechanical  
31 compression. Green fluorescence indicates an increase in the Ca<sup>2+</sup> concentration in the cell.

32 **Supplementary Video 5. NTC (for P1-siRNA) chondrocytes intracellular Ca<sup>2+</sup> response to 5**  
33 **µM Yoda1 addition.** NTC for P1-siRNA cells response to yoda1 addition. Green fluorescence  
34 indicates an increase in the Ca<sup>2+</sup> concentration in the cell.

35 **Supplementary Video 6. P1-siRNA chondrocytes intracellular Ca<sup>2+</sup> response to 5 µM**  
36 **Yoda1 addition.** P1-siRNA cells response to yoda1 addition. Green fluorescence indicates an  
37 increase in the Ca<sup>2+</sup> concentration in the cell.

38 **Supplementary Video 7. NTC (for P2-siRNA) chondrocytes intracellular Ca<sup>2+</sup> response to 5**  
39 **µM Yoda1 addition.** NTC for P2-siRNA cells response to yoda1 addition. Green fluorescence  
40 indicates an increase in the Ca<sup>2+</sup> concentration in the cell.

41 **Supplementary Video 8. P2-siRNA chondrocytes intracellular Ca<sup>2+</sup> response to 5 µM**  
42 **Yoda1 addition.** P2-siRNA cells response to yoda1 addition. Green fluorescence indicates an  
43 increase in the Ca<sup>2+</sup> concentration in the cell.

44 **Supplementary Video 9. Chondrocyte intracellular Ca<sup>2+</sup> response to different levels of**  
45 **mechanical loading.** Representative cells' Ca<sup>2+</sup> signaling to 50 nN force in iso-osmotic  
46 condition. Green fluorescence indicates an increase in the Ca<sup>2+</sup> concentration in the cell.

47 **Supplementary Video 10. Chondrocyte intracellular Ca<sup>2+</sup> response to different levels of**  
48 **mechanical loading.** Representative cells' Ca<sup>2+</sup> signaling to 100 nN force in iso-osmotic  
49 condition. Green fluorescence indicates an increase in the Ca<sup>2+</sup> concentration in the cell.

50 **Supplementary Video 11. Chondrocyte intracellular Ca<sup>2+</sup> response to different levels of**  
51 **mechanical loading.** Representative cells' Ca<sup>2+</sup> signaling to 300 nN force in iso-osmotic  
52 condition. Green fluorescence indicates an increase in the Ca<sup>2+</sup> concentration in the cell.

53 **Supplementary Video 12. Chondrocyte intracellular Ca<sup>2+</sup> response to different levels of**  
54 **mechanical loading.** Representative cells' Ca<sup>2+</sup> signaling to 500 nN force in iso-osmotic  
55 condition. Green fluorescence indicates an increase in the Ca<sup>2+</sup> concentration in the cell.

56
